# Supplementary material for: The Effects of High Fat Diet-Induced Stress on Olfactory Sensitivity, Behaviors, and Transcriptional Profiling in Drosophila melanogaster
Source: PubMed Central journal article supplement (PMC6213603; doi:10.3390/ijms19102855), 2018-09-20
Supplement: ijms-19-02855-s001.pdf [file ijms-19-02855-s001.pdf]

**Supplementary Table 1. Expression profiling of candidate genes involved in insulin pathway.**

| Gene symbol | Flybase Idx | Expression level based on FPKM (High fat diet) | Expression level based on FPKM (Control diet) | Fold-change |
|-------------|-------------|------------------------------------------------|-----------------------------------------------|-------------|
| DILP2       | FBgn0036046 | 9.76                                           | 50.32                                         | -2.36       |
| DILP3       | FBgn0044050 | 12.34                                          | 9.32                                          | 0.40        |
| DILP6       | FBgn0044047 | 129.63                                         | 32.76                                         | 1.98        |
| DILP7       | FBgn0044046 | 2.73                                           | 9.37                                          | -1.77       |
| DILP8       | FBgn0036690 | 17.88                                          | 12.76                                         | 0.49        |
| Chico       | FBgn0024248 | 173.48                                         | 230.87                                        | -0.41       |
| InR         | FBgn0013984 | 283.45                                         | 784.82                                        | -1.47       |
| Pten        | FBgn0026379 | 78.32                                          | 140.87                                        | -0.84       |
